# Supplementary material
Source: publisher figshare collection journal article supplement (https://karger.figshare.com/ndownloader/files/40217512)
Supplement: Supplementary file 1 [file 40217512]

**Supplementary Table 2**. Pearson’s correlation analysis of the mean fractional anisotropy value of the right superior longitudinal fasciculus and clinical manifestations (ASI-R and PDSS) in patients with PD

| Clinical characteristics (mean) | Mean FA value of the right SLF | |
| --- | --- | --- |
|
| *r* | *p*-value |
| Baseline ASI-R total score | 0.096 | 0.511 |
| Fear of respiratory symptoms | - 0.059 | 0.674 |
| Fear of cardiovascular symptoms | 0.022 | 0.878 |
| Fear of publicly observable anxiety reaction s | 0.026 | 0.852 |
| Fear of cognitive dyscontrol | 0.095 | 0.490 |
| PDSS total score at baseline | - 0.171 | 0.211 |
| PDSS total score at 8 weeks | 0.183 | 0.204 |
| PDSS total score at 6 months | 0.034 | 0.829 |
| PDSS total score at 1 year | - 0.177 | 0.281 |
| Abbreviations: PD, panic disorder; SD, standard deviation; FA, fractional anisotropy; SLF, superior longitudinal fasciculus; ASI-R, anxiety sensitivity inventory-revised; PDSS, panic disorder severity scale. | | |
